# Supplementary material
Source: ML conference proceedings conference paper supplement (https://openaccess.thecvf.com/content/CVPR2023/html/Tukra_Improving_Visual_Representation_CVPR_2023_paper.html)
Supplement: Supplementary file 1 [file Tukra_Improving_Visual_Representation_CVPR_2023_supplemental.pdf]

# Supplementary Material for Improving Visual Representation Learning through Perceptual Understanding

Samyakh Tukra    Frederick Hoffman    Ken Chatfield  
Tractable AI  
{samyakh.tukra, frederick.hoffman, ken}@tractable.ai

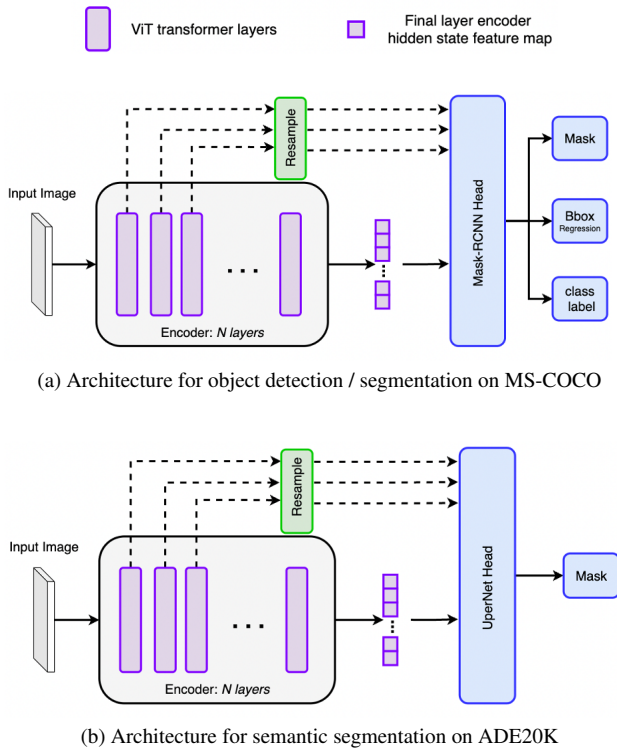

Figure 1. the augmentation performed on the MAE pretrained encoder architecture for downstream fine-tuning

## A. Implementation Details

### A.1. Pre-training

The encoder model architecture follows closely that of the MAE paper [1]. The full configuration of the model and pre-training settings are shown in Table 1. For the ViT-B encoder, the width is set to 768 dimensions and comprises 12 layers each with 12 self-attention heads. For the ViT-L encoder, the width is 1024 dimensions and comprises 24 layers each with 16 self-attention heads. The decoder comprises in both cases 8 layers each with 16 self-attention heads and a width of 512 dimensions.

### A.2. Fine-tuning

The full configuration of the model and fine-tuning settings are shown in Table 2. For MS-COCO, we use a Mask-RCNN backbone as shown in Figure 1a. This uses Feature Pyramid Networks (FPNs) [2] and we adapt the ViT encoder model accordingly. Specifically, as the encoder is composed of multiple ViT transformer layers outputting feature maps at a single scale (unlike convolutional layers), we extract feature maps at 4 layer intervals *i.e.* [0, 4, 8, 12]. Feature maps are resampled to the respective size required by the original Mask-RCNN head. For upsampling, bilinear interpolation is used with a scale factor of two (if required) followed by a 3x3 convolution. For downsampling, the features are reshaped to a square matrix followed by a 3x3 convolution. For segmentation on ADE20K [8], we adopt the UperNet model [5] as our decoder. This follows a similar strategy as Mask-RCNN, necessitating a FPN backbone and the same processing steps described above are applied, as illustrated in Figure 1b

## B. Additional Reconstruction Results

Figure 2 shows additional randomly sampled reconstruction results from the ImageNet 1K validation set. Of note is how as additional perceptual supervision is increased, high-frequency detail such as fur in samples 1 and 3 are reconstructed more faithfully. More interestingly, in sample 2 the eyes are reconstructed properly despite being masked out entirely in the input to the decoder. This suggests that the model learns to capture higher-level semantic information better than when using plain vanilla MSE.

Table 1. Hyperparameters used for pre-training MAE and MSG-MAE on ImageNet 1K data.

| Hyperparameter          | ViT-B             | ViT-L |
|-------------------------|-------------------|-------|
| Image patch size        |                   | 16x16 |
| Hidden size             | 768               | 1024  |
| No. of layers           | 12                | 24    |
| Attention heads         | 12                | 16    |
| FFN hidden size         | 3072              | 4096  |
| Decoder hidden size     |                   | 512   |
| Decoder No. of layers   |                   | 8     |
| Decoder attention heads |                   | 16    |
| Training epochs         | 300               | 1200  |
| Batch size              |                   | 32    |
| Optimizer               | Weighted Adam [3] |       |
| learning rate           | 1.5e-4            |       |
| Weight decay            | 0.05              |       |
| Adam $\beta$            | (0.9, 0.999)      |       |
| Learning rate schedule  | Cosine            |       |
| Warmup epochs           | 40                |       |
| Data augmentations      | RandomResizedCrop |       |
| Input resolution        | 224x224           |       |
| Colour jitter           | 0.4               |       |
| Masking ratio           | 75%               |       |

Table 2. Hyperparameters for linear probing and fine-tuning pre-trained MAE and MSG-MAE on downstream datasets.

| Hyperparameter                 | Value             |
|--------------------------------|-------------------|
| Training epochs                | 130               |
| Batch size                     | 32                |
| Optimizer                      | Weighted Adam [3] |
| learning rate                  | 0.001             |
| Weight decay                   | 0.05              |
| Adam $\beta$                   | (0.9, 0.999)      |
| Learning rate schedule         | Cosine            |
| label smoothing $\epsilon$ [4] | 0.1               |
| mixup [7]                      | 0.8               |
| cutmix [6]                     | 1.0               |
| Warmup epochs                  | 10                |
| Data augmentations             | RandAug(9, 0.5)   |

## References

- [1] Kaiming He, Xinlei Chen, Saining Xie, Yanghao Li, Piotr Dollár, and Ross Girshick. Masked autoencoders are scalable vision learners. *CVPR*, 2022. 1, 3
- [2] T. Lin, P. Dollar, R. Girshick, K. He, B. Hariharan, and S. Belongie. Feature pyramid networks for object detection. In *CVPR*, pages 936–944, Los Alamitos, CA, USA, jul 2017. 1
- [3] Ilya Loshchilov and Frank Hutter. Decoupled weight decay regularization. In *ICLR*. OpenReview.net, 2019. 2
- [4] Christian Szegedy, Vincent Vanhoucke, Sergey Ioffe, Jon Shlens, and Zbigniew Wojna. Rethinking the inception architecture for computer vision. In *CVPR*, pages 2818–2826, 2016. 2
- [5] Tete Xiao, Yingcheng Liu, Bolei Zhou, Yuning Jiang, and Jian Sun. Unified perceptual parsing for scene understanding. In *ECCV*. Springer, 2018. 1
- [6] S. Yun, D. Han, S. Chun, S. Oh, Y. Yoo, and J. Choe. Cutmix: Regularization strategy to train strong classifiers with localizable features. In *ICCV*, pages 6022–6031, Los Alamitos, CA, USA, nov 2019. IEEE Computer Society. 2
- [7] Hongyi Zhang, Moustapha Cissé, Yann N. Dauphin, and David Lopez-Paz. mixup: Beyond empirical risk minimization. In *ICLR*. OpenReview.net, 2018. 2
- [8] Bolei Zhou, Hang Zhao, Xavier Puig, Tete Xiao, Sanja Fidler, Adela Barriuso, and Antonio Torralba. Semantic understanding of scenes through the ade20k dataset. *IJCV*, 127(3):302–321, 2019. 1

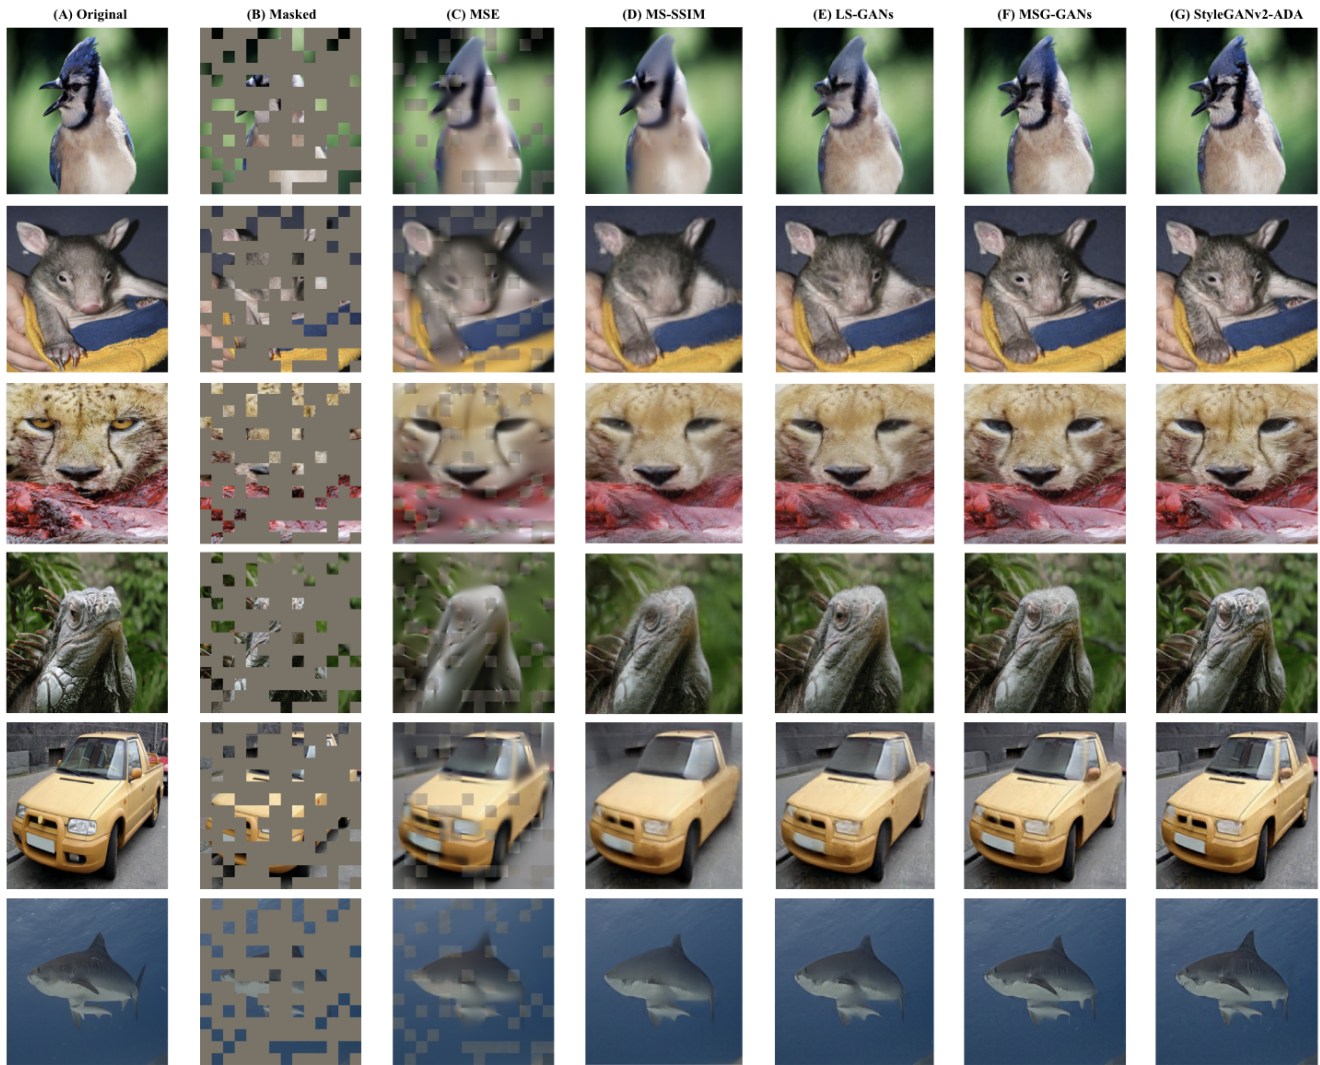

Figure 2. Randomly sampled reconstructions from the ImageNet-1K validation set. Columns are: (A) the original ground truth, (B) the masked input (MIR 75%), (C-G) are the reconstructed outputs generated MAE model trained with: MSE [1], SSIM+L1, LS-GAN-P, MSG-GAN-P, StyleGANv2-ADA-P losses respectively.
